# Supplementary material
Source: MDPI journal article supplement (https://www.mdpi.com/1996-1073/14/23/8177)
Supplement: s1 [file s1]

# Physical Constraints on Global Social-Ecological Energy System

Marco Casazza <sup>1,\*</sup>, Francesco Gonella <sup>2</sup>, Gengyuan Liu <sup>3</sup>, Antonio Proto <sup>4</sup> and Renato Passaro <sup>1</sup>

**1** Department of Engineering, University of Napoli 'Parthenope', 80143 Napoli, Italy; renato.passaro@uniparthenope.it

**2** Department of Molecular Sciences and Nanosystems, Ca' Foscari University of Venice, 30172 Venezia Mestre, Italy; gonella@unive.it

**3** State Key Joint Laboratory of Environmental Simulation and Pollution Control, School of Environment, Beijing Normal University, Beijing 100875, China; liugengyuan@bnu.edu.cn

**4** Department of Chemistry and Biology "Adolfo Zambelli", University of Salerno, Via Giovanni Paolo II 132, 84084 Fisciano, Italy; aproto@unisa.it

\* Correspondence: marco.casazza@uniparthenope.it

This file contains four tables.

Table S1 details world power plant losses, total production and final consumptions and efficiency (i.e.: ratio between total final consumption and total production) from year 1990 to year 2015. Data are expressed in units of [TW], except from efficiency, expressed as percentage.

Table S2 contains the data for performance analysis at Country level for selected Countries (DATA source: IEA). The first column refers to Total Primary Power Supply (derived from Total Primary Energy Supply). The second column refers to efficient power, calculated as the product of efficiency (at Country level: TPES/final consumption) and final power consumption. Data are expressed in units of terawatts, referring to years 2000, 2005, 2010 and 2015. Countries in red identify the nations, whose performance is below the optimum level defined by maximum empower principle. In parallel, Countries in green identify the nations, whose performance is above the optimum level defined by maximum empower principle.

Table S3 contains data of total World power production (in [TW]), world GDP (in billion USD) and energy efficiency (as power intensity, according to International Energy Agency definition). Data refer to the years' period 1990-2011.

Table S4 contains data of world Total Primary Energy Production, sectorial energy consumption (for: (i) industry, agriculture and fisheries; (ii) services, excluding residential sector; (iii) residential sector) and power plant losses. Values, expressed in terawatts, refer to years 1973-2015 (DATA source: IEA).

**Table S1.** World power plant losses, total production and final consumptions. Data are expressed in units of [W].

Efficiency, being the ratio between total final consumption and total production, is expressed as percentage.

| Year | Power plant losses [TW] | Total production [TW] | Total final consumption [TW] | Efficiency |
|------|-------------------------|-----------------------|------------------------------|------------|
| 1990 | 2.11                    | 11.68                 | 8.31                         | 71.2%      |
| 1991 | 2.18                    | 11.70                 | 8.39                         | 71.7%      |
| 1992 | 2.22                    | 11.64                 | 8.37                         | 71.9%      |
| 1993 | 2.23                    | 11.81                 | 8.42                         | 71.3%      |
| 1994 | 2.28                    | 11.98                 | 8.46                         | 70.6%      |
| 1995 | 2.36                    | 12.28                 | 8.67                         | 70.6%      |
| 1996 | 2.49                    | 12.57                 | 8.82                         | 70.1%      |
| 1997 | 2.52                    | 12.74                 | 8.93                         | 70.0%      |
| 1998 | 2.57                    | 12.89                 | 8.94                         | 69.4%      |
| 1999 | 2.59                    | 12.91                 | 9.11                         | 70.6%      |
| 2000 | 2.68                    | 13.29                 | 9.33                         | 70.2%      |
| 2001 | 2.76                    | 13.51                 | 9.38                         | 69.4%      |
| 2002 | 2.80                    | 13.60                 | 9.53                         | 70.0%      |
| 2003 | 2.92                    | 14.16                 | 9.82                         | 69.3%      |
| 2004 | 3.05                    | 14.85                 | 10.26                        | 69.1%      |
| 2005 | 3.16                    | 15.31                 | 10.52                        | 68.7%      |
| 2006 | 3.25                    | 15.76                 | 10.79                        | 68.5%      |
| 2007 | 3.34                    | 16.02                 | 11.10                        | 69.3%      |
| 2008 | 3.34                    | 16.34                 | 11.20                        | 68.5%      |
| 2009 | 3.30                    | 16.20                 | 11.07                        | 68.4%      |
| 2010 | 3.49                    | 16.97                 | 11.64                        | 68.6%      |
| 2011 | 3.57                    | 17.39                 | 11.83                        | 68.0%      |

|      |      |       |       |       |
|------|------|-------|-------|-------|
| 2012 | 3.61 | 17.62 | 11.95 | 67.8% |
| 2013 | 3.65 | 17.87 | 12.17 | 68.1% |
| 2014 | 3.69 | 18.17 | 12.31 | 67.8% |
| 2015 | 3.67 | 18.28 | 12.44 | 68.0% |

**Table S2.** Performance analysis at Country level for selected Countries (DATA source: IEA). The first column refers to Total Primary Power Supply (derived from Total Primary Energy Supply). The second column refers to efficient power, calculated as the product of efficiency (at Country level: TPES/final consumption) and final power consumption. Data are expressed in units of terawatts, referring to years 2000, 2005, 2010 and 2015. Data are ranked in growing order of  $W_{in}$ . Countries in red identify the nations, whose performance is below the optimum level defined by maximum empower principle. In parallel, Countries in red identify the nations, whose performance is above the optimum level defined by maximum empower principle.

| 2000            |             |                  | 2005            |             |                  | 2010            |             |                  | 2015            |             |                  |
|-----------------|-------------|------------------|-----------------|-------------|------------------|-----------------|-------------|------------------|-----------------|-------------|------------------|
| Country         | $P$<br>[TW] | $W_{in}$<br>[TW] |
| Iceland         | 0.00        | 0.00             | Iceland         | 0.00        | 0.00             | Luxembourg      | 0.00        | 0.01             | Luxembourg      | 0.00        | 0.00             |
| Luxembourg      | 0.00        | 0.00             | Luxembourg      | 0.00        | 0.01             | Latvia          | 0.00        | 0.01             | Latvia          | 0.00        | 0.01             |
| Latvia          | 0.00        | 0.01             | Latvia          | 0.00        | 0.01             | Iceland         | 0.00        | 0.01             | Estonia         | 0.00        | 0.01             |
| Estonia         | 0.00        | 0.01             | Estonia         | 0.00        | 0.01             | Estonia         | 0.00        | 0.01             | Iceland         | 0.00        | 0.01             |
| Slovenia        | 0.00        | 0.01             |
| Morocco         | 0.01        | 0.01             | Ireland         | 0.01        | 0.02             | Ireland         | 0.01        | 0.02             | Ireland         | 0.01        | 0.02             |
| Ireland         | 0.01        | 0.02             | Morocco         | 0.01        | 0.02             | Morocco         | 0.01        | 0.02             | Denmark         | 0.01        | 0.02             |
| New Zealand     | 0.01        | 0.02             | New Zealand     | 0.01        | 0.02             | Slovak Republic | 0.01        | 0.02             | Slovak Republic | 0.01        | 0.02             |
| Slovak Republic | 0.01        | 0.02             | Israel          | 0.01        | 0.02             | New Zealand     | 0.01        | 0.02             | Morocco         | 0.01        | 0.03             |
| Israel          | 0.01        | 0.02             | Slovak Republic | 0.01        | 0.02             | Denmark         | 0.01        | 0.03             | New Zealand     | 0.01        | 0.03             |
| Denmark         | 0.01        | 0.02             | Denmark         | 0.01        | 0.03             | Israel          | 0.01        | 0.03             | Portugal        | 0.01        | 0.03             |
| Singapore       | 0.00        | 0.02             | Singapore       | 0.00        | 0.03             | Portugal        | 0.02        | 0.03             | Israel          | 0.01        | 0.03             |
| Portugal        | 0.02        | 0.03             | Switzerland     | 0.02        | 0.03             | Singapore       | 0.01        | 0.03             | Greece          | 0.01        | 0.03             |
| Hungary         | 0.01        | 0.03             | Portugal        | 0.02        | 0.04             | Switzerland     | 0.02        | 0.03             | Switzerland     | 0.02        | 0.03             |
| Switzerland     | 0.02        | 0.03             | Norway          | 0.02        | 0.04             | Hungary         | 0.01        | 0.04             | Hungary         | 0.02        | 0.03             |

| Country                          | 2000      |      | Country                          | 2005      |      | Country        | 2010      |      | Country        | 2015      |      |
|----------------------------------|-----------|------|----------------------------------|-----------|------|----------------|-----------|------|----------------|-----------|------|
|                                  | P         | Win  |                                  | P         | Win  |                | P         | Win  |                | P         | Win  |
|                                  | [TW<br>I] | [TW] |                                  | [TW<br>I] | [TW] |                | [TW<br>I] | [TW] |                | [TW<br>I] | [TW] |
| Chile                            | 0.02      | 0.03 | Hungary                          | 0.02      | 0.04 | Greece         | 0.02      | 0.04 | Singapore      | 0.01      | 0.04 |
| Norway                           | 0.02      | 0.03 | Chile                            | 0.02      | 0.04 | Norway         | 0.02      | 0.04 | Norway         | 0.01      | 0.04 |
| Greece                           | 0.02      | 0.04 | Greece                           | 0.02      | 0.04 | Chile          | 0.02      | 0.04 | Finland        | 0.02      | 0.04 |
| Austria                          | 0.02      | 0.04 | Austria                          | 0.03      | 0.04 | Austria        | 0.03      | 0.04 | Austria        | 0.03      | 0.04 |
| Finland                          | 0.02      | 0.04 | Finland                          | 0.02      | 0.05 | Finland        | 0.02      | 0.05 | Chile          | 0.02      | 0.05 |
| Czech Republic                   | 0.02      | 0.05 | Czech Republic                   | 0.02      | 0.06 | Czech Republic | 0.02      | 0.06 | Czech Republic | 0.02      | 0.06 |
| Sweden                           | 0.03      | 0.06 | Sweden                           | 0.03      | 0.07 | Sweden         | 0.03      | 0.07 | Sweden         | 0.03      | 0.06 |
| Belgium                          | 0.03      | 0.08 | Belgium                          | 0.03      | 0.08 | Belgium        | 0.03      | 0.08 | Belgium        | 0.03      | 0.07 |
| Thailand                         | 0.04      | 0.10 | Netherlands                      | 0.04      | 0.11 | Netherlands    | 0.04      | 0.11 | Netherlands    | 0.03      | 0.10 |
| Netherlands                      | 0.04      | 0.10 | Turkey                           | 0.06      | 0.11 | Poland         | 0.06      | 0.13 | Poland         | 0.05      | 0.13 |
| Turkey                           | 0.05      | 0.10 | Poland                           | 0.05      | 0.12 | Turkey         | 0.06      | 0.14 | Spain          | 0.06      | 0.16 |
| Poland                           | 0.04      | 0.12 | Thailand                         | 0.04      | 0.13 | Thailand       | 0.05      | 0.16 | Australia      | 0.06      | 0.17 |
| Australia                        | 0.05      | 0.14 | Australia                        | 0.05      | 0.15 | Australia      | 0.05      | 0.17 | Turkey         | 0.08      | 0.17 |
| Spain                            | 0.06      | 0.16 | Spain                            | 0.08      | 0.19 | Spain          | 0.08      | 0.17 | Thailand       | 0.06      | 0.18 |
| Mexico                           | 0.07      | 0.20 | Indonesia                        | 0.11      | 0.24 | Italy          | 0.12      | 0.23 | Italy          | 0.11      | 0.20 |
| Indonesia                        | 0.10      | 0.21 | Mexico                           | 0.07      | 0.24 | Mexico         | 0.09      | 0.24 | United Kingdom | 0.10      | 0.24 |
| Italy                            | 0.11      | 0.23 | Italy                            | 0.13      | 0.25 | United Kingdom | 0.11      | 0.27 | Mexico         | 0.09      | 0.25 |
| Brazil                           | 0.14      | 0.25 | Korea                            | 0.08      | 0.28 | Indonesia      | 0.11      | 0.27 | Indonesia      | 0.15      | 0.30 |
| Korea                            | 0.07      | 0.25 | Brazil                           | 0.16      | 0.29 | Korea          | 0.08      | 0.33 | France         | 0.10      | 0.33 |
| United Kingdom                   | 0.12      | 0.30 | United Kingdom                   | 0.11      | 0.30 | Canada         | 0.14      | 0.35 | Korea          | 0.08      | 0.36 |
| France                           | 0.11      | 0.33 | France                           | 0.11      | 0.36 | France         | 0.11      | 0.35 | Canada         | 0.14      | 0.37 |
| Canada                           | 0.15      | 0.34 | Canada                           | 0.15      | 0.36 | Brazil         | 0.19      | 0.35 | Brazil         | 0.20      | 0.39 |
| Germany                          | 0.17      | 0.45 | Germany                          | 0.17      | 0.45 | Germany        | 0.17      | 0.43 | Germany        | 0.17      | 0.41 |
| India                            | 0.25      | 0.59 | India                            | 0.28      | 0.68 | Japan          | 0.20      | 0.66 | Japan          | 0.21      | 0.57 |
| Japan                            | 0.22      | 0.69 | Japan                            | 0.22      | 0.69 | India          | 0.38      | 0.93 | India          | 0.41      | 1.11 |
| People's<br>Republic of<br>China | 0.61      | 1.50 | People's<br>Republic of<br>China | 0.97      | 2.37 | United States  | 1.14      | 2.94 | United States  | 1.15      | 2.90 |

| 2000          |             |               | 2005          |             |               | 2010                             |             |               | 2015                             |             |               |
|---------------|-------------|---------------|---------------|-------------|---------------|----------------------------------|-------------|---------------|----------------------------------|-------------|---------------|
| Country       | $P$<br>[TW] | $Win$<br>[TW] | Country       | $P$<br>[TW] | $Win$<br>[TW] | Country                          | $P$<br>[TW] | $Win$<br>[TW] | Country                          | $P$<br>[TW] | $Win$<br>[TW] |
| United States | 1.13        | 3.02          | United States | 1.13        | 3.08          | People's<br>Republic of<br>China | 1.20        | 3.37          | People's<br>Republic of<br>China | 1.44        | 3.97          |

**Table S3.** Total World power production (in [W]), world GDP (in USD), and energy efficiency (as energy intensity, according to IEA definition)

| Year | Total production | GDP                              | Energy efficiency             |
|------|------------------|----------------------------------|-------------------------------|
|      | [TW]             | [billion USD] (year 2011 values) | (as energy intensity) [W/USD] |
| 1990 | 11.68            | 38.13                            | 306.26                        |
| 1991 | 11.70            | 38.97                            | 300.28                        |
| 1992 | 11.64            | 39.82                            | 292.26                        |
| 1993 | 11.81            | 40.66                            | 290.50                        |
| 1994 | 11.98            | 42.05                            | 284.90                        |
| 1995 | 12.28            | 43.42                            | 282.78                        |
| 1996 | 12.57            | 45.05                            | 279.09                        |
| 1997 | 12.74            | 46.88                            | 271.86                        |
| 1998 | 12.89            | 48.08                            | 267.99                        |
| 1999 | 12.91            | 49.83                            | 259.12                        |
| 2000 | 13.29            | 52.22                            | 254.54                        |
| 2001 | 13.51            | 53.42                            | 252.82                        |
| 2002 | 13.60            | 54.95                            | 247.60                        |
| 2003 | 14.16            | 56.94                            | 248.76                        |
| 2004 | 14.85            | 59.71                            | 248.65                        |

|      |       |       |        |
|------|-------|-------|--------|
| 2005 | 15.31 | 62.44 | 245.24 |
| 2006 | 15.76 | 65.73 | 239.70 |
| 2007 | 16.02 | 69.31 | 231.17 |
| 2008 | 16.34 | 71.24 | 229.38 |
| 2009 | 16.20 | 70.77 | 228.86 |
| 2010 | 16.97 | 74.38 | 228.07 |
| 2011 | 17.39 | 77.21 | 225.23 |

**Table S4.** World Total Primary Energy Production, sectorial energy consumption (for: (i) industry, agriculture and fishing; (ii) services, excluding residential sector; (iii) residential sector) and power plant losses. Values, expressed in terawatts, refer to years 1973-2015 (DATA source: IEA).

| Year | Total Primary<br>Energy Production<br>[TW] | Energy Consumption<br>[TW]                     |                                               |                    | Power plant<br>losses (TS)<br>[TW] |
|------|--------------------------------------------|------------------------------------------------|-----------------------------------------------|--------------------|------------------------------------|
|      |                                            | Industry, agriculture<br>and fisheries<br>(pV) | Services<br>(excl. residential sector)<br>(E) | Residential<br>(M) |                                    |
|      |                                            |                                                |                                               |                    |                                    |
|      |                                            |                                                |                                               |                    |                                    |
| 1973 | 8.10                                       | 2.21                                           | 2.15                                          | 1.45               | 1.05                               |
| 1974 | 8.15                                       | 1.65                                           | 2.14                                          | 1.44               | 1.08                               |
| 1975 | 8.21                                       | 2.18                                           | 2.14                                          | 1.55               | 1.12                               |
| 1976 | 8.66                                       | 2.30                                           | 2.25                                          | 1.56               | 1.21                               |
| 1977 | 9.32                                       | 2.42                                           | 2.31                                          | 1.58               | 1.29                               |
| 1978 | 9.60                                       | 2.48                                           | 2.41                                          | 1.63               | 1.33                               |
| 1979 | 9.57                                       | 2.60                                           | 2.46                                          | 1.65               | 1.38                               |
| 1980 | 9.50                                       | 2.56                                           | 2.40                                          | 1.69               | 1.42                               |
| 1981 | 9.50                                       | 2.52                                           | 2.40                                          | 1.70               | 1.44                               |
| 1982 | 9.61                                       | 2.46                                           | 2.38                                          | 1.73               | 1.45                               |
| 1983 | 9.61                                       | 2.45                                           | 2.40                                          | 1.75               | 1.51                               |
| 1984 | 9.99                                       | 2.57                                           | 2.45                                          | 1.83               | 1.61                               |

| Year | Total Primary<br>Energy Production<br>[TW] | Energy Consumption                             |                                   |                     | Power plant<br>losses (TS)<br>[TW] |
|------|--------------------------------------------|------------------------------------------------|-----------------------------------|---------------------|------------------------------------|
|      |                                            | [TW]                                           |                                   |                     |                                    |
|      |                                            | Industry, agriculture<br>and fisheries<br>(pV) | Services                          | Residential<br>(✱N) |                                    |
|      |                                            |                                                | (excl. residential sector)<br>(E) |                     |                                    |
| 1985 | 10.26                                      | 2.56                                           | 2.48                              | 1.91                | 1.69                               |
| 1986 | 10.47                                      | 2.59                                           | 2.56                              | 1.93                | 1.75                               |
| 1987 | 10.86                                      | 2.67                                           | 2.64                              | 1.98                | 1.84                               |
| 1988 | 11.24                                      | 2.75                                           | 2.75                              | 2.01                | 1.94                               |
| 1989 | 11.43                                      | 2.72                                           | 2.81                              | 2.04                | 2.06                               |
| 1990 | 11.65                                      | 2.62                                           | 3.03                              | 2.04                | 2.11                               |
| 1991 | 11.73                                      | 2.61                                           | 3.07                              | 2.07                | 2.18                               |
| 1992 | 11.74                                      | 2.55                                           | 3.08                              | 2.08                | 2.22                               |
| 1993 | 11.86                                      | 2.53                                           | 2.97                              | 2.27                | 2.23                               |
| 1994 | 11.94                                      | 2.53                                           | 3.02                              | 2.25                | 2.28                               |
| 1995 | 12.25                                      | 2.61                                           | 3.06                              | 2.29                | 2.36                               |
| 1996 | 12.56                                      | 2.57                                           | 3.19                              | 2.34                | 2.49                               |
| 1997 | 12.69                                      | 2.61                                           | 3.21                              | 2.34                | 2.52                               |
| 1998 | 12.75                                      | 2.60                                           | 3.26                              | 2.32                | 2.57                               |
| 1999 | 13.02                                      | 2.60                                           | 3.37                              | 2.36                | 2.59                               |
| 2000 | 13.31                                      | 2.68                                           | 3.44                              | 2.40                | 2.68                               |
| 2001 | 13.46                                      | 2.67                                           | 3.47                              | 2.42                | 2.76                               |
| 2002 | 13.74                                      | 2.69                                           | 3.57                              | 2.44                | 2.80                               |
| 2003 | 14.21                                      | 2.79                                           | 3.67                              | 2.50                | 2.92                               |
| 2004 | 14.85                                      | 3.00                                           | 3.82                              | 2.52                | 3.05                               |
| 2005 | 15.27                                      | 3.13                                           | 3.93                              | 2.53                | 3.16                               |
| 2006 | 15.72                                      | 3.28                                           | 4.01                              | 2.54                | 3.25                               |

| Year | Total Primary<br>Energy Production<br>[TW] | Energy Consumption<br>[TW]                     |                                               |                     | Power plant<br>losses (TS)<br>[TW] |
|------|--------------------------------------------|------------------------------------------------|-----------------------------------------------|---------------------|------------------------------------|
|      |                                            | Industry, agriculture<br>and fisheries<br>(pV) | Services<br>(excl. residential sector)<br>(E) | Residential<br>(ϯN) |                                    |
|      |                                            |                                                |                                               |                     |                                    |
|      |                                            |                                                |                                               |                     |                                    |
| 2007 | 16.14                                      | 3.41                                           | 4.15                                          | 2.55                | 3.34                               |
| 2008 | 16.33                                      | 3.47                                           | 4.20                                          | 2.58                | 3.34                               |
| 2009 | 16.19                                      | 3.37                                           | 4.15                                          | 2.58                | 3.30                               |
| 2010 | 17.09                                      | 3.66                                           | 4.32                                          | 2.65                | 3.49                               |
| 2011 | 17.34                                      | 3.80                                           | 4.37                                          | 2.63                | 3.57                               |
| 2012 | 17.61                                      | 3.81                                           | 4.46                                          | 2.64                | 3.61                               |
| 2013 | 17.83                                      | 3.85                                           | 4.57                                          | 2.70                | 3.65                               |
| 2014 | 18.06                                      | 3.89                                           | 4.64                                          | 2.70                | 3.69                               |
| 2015 | 18.12                                      | 3.87                                           | 4.76                                          | 2.72                | 3.67                               |

**Table S5.** World Total Primary Energy Production, sectorial energy consumption (for: (i) industry, agriculture and fishing; (ii) services, excluding residential sector; (iii) residential sector) and power plant losses. Values, expressed as %, refer to years 1973-2015 (DATA source: IEA).

| Year | Energy Consumption [% of TPES] |                                 |                 | Power plant losses (TS) [% of TPES] | Differences [%] |
|------|--------------------------------|---------------------------------|-----------------|-------------------------------------|-----------------|
|      | Industry,                      | Services, excl. residential (E) | Residential (N) |                                     |                 |
|      | agriculture and fishing (pV)   |                                 |                 |                                     |                 |
|      |                                |                                 |                 |                                     |                 |
| 1973 | 27%                            | 27%                             | 18%             | 13%                                 | 15%             |
| 1974 | 20%                            | 26%                             | 18%             | 13%                                 | 23%             |
| 1975 | 27%                            | 26%                             | 19%             | 14%                                 | 15%             |
| 1976 | 27%                            | 26%                             | 18%             | 14%                                 | 15%             |



| Year | Energy Consumption [% of TPES]                  |                                    |                     |                                           | Differences [%] |
|------|-------------------------------------------------|------------------------------------|---------------------|-------------------------------------------|-----------------|
|      | Industry,<br>agriculture<br>and fishing<br>(pV) | Services, excl.<br>residential (E) | Residential<br>(%N) | Power plant<br>losses (TS) [% of<br>TPES] |                 |
| 1977 | 26%                                             | 25%                                | 17%                 | 14%                                       | 18%             |
| 1978 | 26%                                             | 25%                                | 17%                 | 14%                                       | 18%             |
| 1979 | 27%                                             | 26%                                | 17%                 | 14%                                       | 15%             |
| 1980 | 27%                                             | 25%                                | 18%                 | 15%                                       | 15%             |
| 1981 | 27%                                             | 25%                                | 18%                 | 15%                                       | 15%             |
| 1982 | 26%                                             | 25%                                | 18%                 | 15%                                       | 17%             |
| 1983 | 26%                                             | 25%                                | 18%                 | 16%                                       | 16%             |
| 1984 | 26%                                             | 25%                                | 18%                 | 16%                                       | 15%             |
| 1985 | 25%                                             | 24%                                | 19%                 | 16%                                       | 16%             |
| 1986 | 25%                                             | 24%                                | 18%                 | 17%                                       | 16%             |
| 1987 | 25%                                             | 24%                                | 18%                 | 17%                                       | 16%             |
| 1988 | 24%                                             | 24%                                | 18%                 | 17%                                       | 16%             |
| 1989 | 24%                                             | 25%                                | 18%                 | 18%                                       | 16%             |
| 1990 | 22%                                             | 26%                                | 17%                 | 18%                                       | 16%             |
| 1991 | 22%                                             | 26%                                | 18%                 | 19%                                       | 15%             |
| 1992 | 22%                                             | 26%                                | 18%                 | 19%                                       | 15%             |
| 1993 | 21%                                             | 25%                                | 19%                 | 19%                                       | 16%             |
| 1994 | 21%                                             | 25%                                | 19%                 | 19%                                       | 16%             |
| 1995 | 21%                                             | 25%                                | 19%                 | 19%                                       | 16%             |
| 1996 | 20%                                             | 25%                                | 19%                 | 20%                                       | 16%             |
| 1997 | 21%                                             | 25%                                | 18%                 | 20%                                       | 16%             |
| 1998 | 20%                                             | 26%                                | 18%                 | 20%                                       | 16%             |

| Year | Energy Consumption [% of TPES]         |                                 |                 |                                     | Differences [%] |
|------|----------------------------------------|---------------------------------|-----------------|-------------------------------------|-----------------|
|      | Industry, agriculture and fishing (pV) | Services, excl. residential (E) | Residential (N) | Power plant losses (TS) [% of TPES] |                 |
| 1999 | 20%                                    | 26%                             | 18%             | 20%                                 | 16%             |
| 2000 | 20%                                    | 26%                             | 18%             | 20%                                 | 16%             |
| 2001 | 20%                                    | 26%                             | 18%             | 20%                                 | 16%             |
| 2002 | 20%                                    | 26%                             | 18%             | 20%                                 | 16%             |
| 2003 | 20%                                    | 26%                             | 18%             | 21%                                 | 16%             |
| 2004 | 20%                                    | 26%                             | 17%             | 21%                                 | 17%             |
| 2005 | 21%                                    | 26%                             | 17%             | 21%                                 | 17%             |
| 2006 | 21%                                    | 26%                             | 16%             | 21%                                 | 17%             |
| 2007 | 21%                                    | 26%                             | 16%             | 21%                                 | 17%             |
| 2008 | 21%                                    | 26%                             | 16%             | 20%                                 | 17%             |
| 2009 | 21%                                    | 26%                             | 16%             | 20%                                 | 17%             |
| 2010 | 21%                                    | 25%                             | 15%             | 20%                                 | 17%             |
| 2011 | 22%                                    | 25%                             | 15%             | 21%                                 | 17%             |
| 2012 | 22%                                    | 25%                             | 15%             | 20%                                 | 18%             |
| 2013 | 22%                                    | 26%                             | 15%             | 20%                                 | 17%             |
| 2014 | 22%                                    | 26%                             | 15%             | 20%                                 | 17%             |
| 2015 | 21%                                    | 26%                             | 15%             | 20%                                 | 17%             |
